# Supplementary material for: Healthcare Disparities and Outcomes of Cancer Patients in a Community Setting from a COVID-19 Epicenter
Source: MDPI journal article supplement (doi:10.3390/curroncol29020098), 2022-02-16
Supplement: s1 [file s1]

Article

# Healthcare Disparities and Outcomes of Cancer Patients in a Community Setting from a COVID-19 Epicenter

Brianna M. Jones, Eric J. Lehrer, Anurag Saraf, Zahra Shafaei, Lucas Resende Salgado and Virginia W. Osborn

Supplementary Table S1. Summary of COVID-related deaths.

| Age | Sex    | Race  | Ethnicity    | Insurance | Smoking status | BMI  | Comorbidities                                  | Tumor type                           | Stage | Treatment intent | Chemotherapy            | Radiation     | Surgery   | Interval from last cancer treatment (days) |
|-----|--------|-------|--------------|-----------|----------------|------|------------------------------------------------|--------------------------------------|-------|------------------|-------------------------|---------------|-----------|--------------------------------------------|
| 46  | Male   | Other | Hispanic     | Medicaid  | Never          | 20.8 | Diabetes, kidney disease                       | Mucoepidermoid carcinoma of parotid  | I     | Curative         | na                      | 56 Gy/28 fx   | na        | 13                                         |
| 40  | Male   | Other | Hispanic     | Medicaid  | Current        | 23.4 | na                                             | Squamous cell carcinoma of esophagus | III   | Curative         | Capecitabine Oxalplatin | 50.4 Gy/28 fx | na        | 36                                         |
| 59  | Male   | Other | Hispanic     | Medicaid  | Never          | 32.5 | Diabetes                                       | Rectal adenocarcinoma                | IIIC  | Curative         | Capecitabine            | 50.4 Gy/28 fx | na        | 15                                         |
| 77  | Male   | Asian | Non-Hispanic | Medicaid  | Former         | 21.6 | Diabetes, cardiovascular disease, hypertension | Squamous cell carcinoma of lung      | IIIC  | Curative         | Paclitaxel Carboplatin  | na            | na        | 16                                         |
| 80  | Female | Other | Hispanic     | Medicare  | Never          | 24.1 | na                                             | Myeloproliferative neoplasm          | na    | Curative         | Hydroxyurea             | na            | na        | 1                                          |
| 63  | Male   | Other | Hispanic     | Medicaid  | Former         | 29.9 | na                                             | Adenocarcinoma of stomach            | IV    | Palliative       | na                      | na            | Resection | 16                                         |
